# Supplementary material
Source: Springer Nature journal article supplement (https://www.springermedizin.de/resource/supplementary/12882_2014_877_MOESM2_ESM.pdf/9454514)

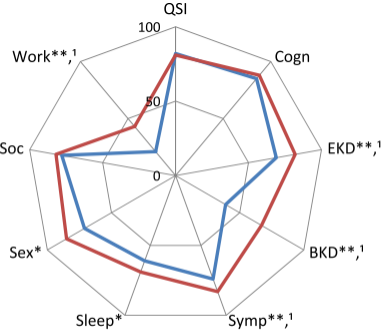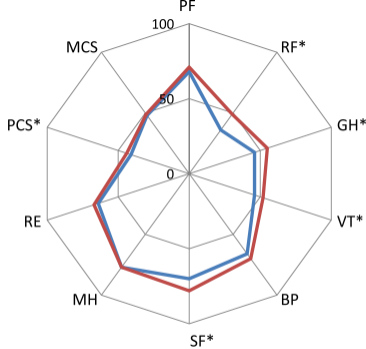

— Dialysis — Transplantation

Supplement: MOESM2 [file 9454514]
